# Supplementary material for: Comparative transmissibility of SARS-CoV-2 variants Delta and Alpha in New England, USA
Source: PubMed Central journal article supplement — medRxiv. 2021 Oct 7:2021.10.06.21264641. Preprint. [Version 1] doi: 10.1101/2021.10.06.21264641 (PMC8509091; doi:10.1101/2021.10.06.21264641), 2021-10-07
Supplement: media-2.pdf [file media-2.pdf]

| <b>Pango Lineage</b> | <b>Number of Genomes</b> | <b>Pango Lineage</b> | <b>Number of Genomes</b> | <b>Pango Lineage</b> | <b>Number of Genomes</b> |
|----------------------|--------------------------|----------------------|--------------------------|----------------------|--------------------------|
| B.1.1.7              | 14207                    | B.1.617.1            | 18                       | B.1.160              | 2                        |
| B.1.2                | 3374                     | B.1.625              | 18                       | B.1.243.1            | 2                        |
| B.1.526              | 2989                     | B.1.177              | 14                       | B.1.284              | 2                        |
| B.1.617.2            | 2624                     | B.1.400              | 14                       | B.1.320              | 2                        |
| P.1                  | 2535                     | B.1.1.207            | 13                       | B.1.333              | 2                        |
| B.1.517              | 986                      | B.1.1.28             | 13                       | B.1.351.3            | 2                        |
| B.1.429              | 654                      | B.1.582              | 13                       | B.1.36.8             | 2                        |
| B.1.596              | 487                      | B.1.609              | 13                       | B.1.395              | 2                        |
| B.1                  | 439                      | C.36.3               | 13                       | B.1.404              | 2                        |
| B.1.575              | 397                      | B.1.466.1            | 11                       | B.1.428              | 2                        |
| R.1                  | 342                      | B.1.1.231            | 10                       | B.1.574              | 2                        |
| AY.3                 | 321                      | B.1.612              | 10                       | B.1.601              | 2                        |
| B.1.1.519            | 240                      | B.1.1.318            | 9                        | B.1.628              | 2                        |
| B.1.243              | 235                      | B.1.1.33             | 9                        | C.23                 | 2                        |
| B.1.375              | 235                      | B.1.298              | 9                        | A.5                  | 1                        |
| B.1.427              | 230                      | B.1.362              | 8                        | B.1.1.10             | 1                        |
| B.1.1.316            | 204                      | B.1.580              | 8                        | B.1.1.115            | 1                        |
| B.1.525              | 188                      | B.1.1.416            | 7                        | B.1.1.189            | 1                        |
| B.1.240              | 183                      | B.1.139              | 7                        | B.1.1.198            | 1                        |
| B.1.568              | 167                      | B.1.478              | 7                        | B.1.1.220            | 1                        |
| P.2                  | 158                      | B.1.509              | 7                        | B.1.1.221            | 1                        |
| B.1.1                | 141                      | B.1.551              | 7                        | B.1.1.272            | 1                        |
| B.1.1.486            | 98                       | B.1.1.320            | 6                        | B.1.1.305            | 1                        |
| B.1.409              | 93                       | B.1.160.16           | 6                        | B.1.1.34             | 1                        |
| P.1.1                | 89                       | B.1.591              | 6                        | B.1.1.340            | 1                        |
| B.1.351              | 83                       | B.1.1.351            | 5                        | B.1.1.372            | 1                        |
| B.1.433              | 78                       | B.1.498              | 5                        | B.1.1.374            | 1                        |
| B.1.349              | 73                       | B.1.543              | 5                        | B.1.1.393            | 1                        |
| B.1.1.434            | 71                       | B.1.561              | 5                        | B.1.1.397            | 1                        |
| B.1.577              | 65                       | B.1.1.432            | 4                        | B.1.1.420            | 1                        |
| B.1.621.1            | 62                       | B.1.361              | 4                        | B.1.1.487            | 1                        |
| B.1.234              | 60                       | C.36.3.1             | 4                        | B.1.1.517            | 1                        |
| B.1.110.3            | 58                       | P.1.7                | 4                        | B.1.1.518            | 1                        |
| R.2                  | 58                       | A                    | 3                        | B.1.119              | 1                        |
| B.1.1.348            | 54                       | A.2.5.1              | 3                        | B.1.131              | 1                        |
| B.1.311              | 51                       | AY.2                 | 3                        | B.1.153              | 1                        |
| C.37                 | 50                       | B.1.1.135            | 3                        | B.1.258              | 1                        |
| B.1.626              | 46                       | B.1.1.274            | 3                        | B.1.280              | 1                        |
| B.1.621              | 44                       | B.1.1.485            | 3                        | B.1.302              | 1                        |
| B.1.1.222            | 43                       | B.1.1.523            | 3                        | B.1.336              | 1                        |

|           |    |           |   |           |   |
|-----------|----|-----------|---|-----------|---|
| B.1.111   | 43 | B.1.241   | 3 | B.1.346   | 1 |
| B.1.1.192 | 38 | B.1.265   | 3 | B.1.36.1  | 1 |
| B.1.1.524 | 36 | B.1.36.10 | 3 | B.1.36.29 | 1 |
| A.2.5     | 34 | B.1.396   | 3 | B.1.378   | 1 |
| B.1.1.265 | 31 | B.1.473   | 3 | B.1.420   | 1 |
| B.1.603   | 30 | B.1.517.1 | 3 | B.1.446   | 1 |
| B.1.588   | 27 | B.1.623   | 3 | B.1.510   | 1 |
| B.1.595   | 24 | B.1.630   | 3 | B.1.556   | 1 |
| B.1.1.304 | 23 | P.1.2     | 3 | B.1.563   | 1 |
| B.1.369   | 23 | AY.1      | 2 | B.1.564   | 1 |
| AY.3.1    | 22 | B         | 2 | B.1.575.1 | 1 |
| A.2.5.2   | 21 | B.1.1.1   | 2 | B.1.594   | 1 |
| B.1.448   | 21 | B.1.1.312 | 2 | B.1.602   | 1 |
| A.23.1    | 19 | B.1.1.317 | 2 | B.1.617.3 | 1 |
| B.1.565   | 19 | B.1.1.329 | 2 | B.1.631   | 1 |
| B.1.604   | 19 | B.1.1.368 | 2 | C.31      | 1 |
| B.1.1.25  | 18 | B.1.1.411 | 2 | C.36      | 1 |
| B.1.324   | 18 | B.1.1.464 | 2 | P.1.3     | 1 |
