# Supplementary material for: Comparative transmissibility of SARS-CoV-2 variants Delta and Alpha in New England, USA
Source: bioRxiv or medRxiv preprint supplement (doi:10.1101/2021.10.06.21264641), 2021-10-07
Supplement: Supplementary file [file media-3.pdf]

| <b>GISAID Submitting Lab</b>                 | <b>CT</b>   | <b>ME</b>   | <b>MA</b>    | <b>NH</b>   | <b>RI</b>   | <b>VT</b>   | <b>Total</b> |
|----------------------------------------------|-------------|-------------|--------------|-------------|-------------|-------------|--------------|
| Centers for Disease Control and Prevention   | 2560        | 738         | 7135         | 1469        | 1438        | 260         | <b>13600</b> |
| Broad Institute                              | 209         | 87          | 7826         | 279         | 1428        | 586         | <b>10415</b> |
| Yale University                              | 3194        | 13          | 117          | 14          | 6           | 0           | <b>3344</b>  |
| The Jackson Laboratory                       | 928         | 2345        | 3            | 2           | 1           | 0           | <b>3279</b>  |
| Massachusetts State Public Health Laboratory | 0           | 0           | 1480         | 0           | 2           | 194         | <b>1676</b>  |
| Rhode Island State Health Laboratory         | 0           | 0           | 0            | 0           | 346         | 0           | <b>346</b>   |
| Quest Diagnostics                            | 64          | 12          | 196          | 21          | 10          | 3           | <b>306</b>   |
| Connecticut Department of Public Health      | 179         | 0           | 0            | 0           | 0           | 0           | <b>179</b>   |
| Health and Environmental Testing Laboratory  | 0           | 123         | 0            | 0           | 0           | 0           | <b>123</b>   |
| Brown University                             | 0           | 0           | 0            | 0           | 55          | 0           | <b>55</b>    |
| University of Michigan                       | 0           | 0           | 36           | 0           | 0           | 0           | <b>36</b>    |
| US Air Force School of Aerospace Medicine    | 1           | 2           | 0            | 0           | 7           | 0           | <b>10</b>    |
| UConn Health                                 | 9           | 0           | 0            | 0           | 0           | 0           | <b>9</b>     |
| New York University                          | 4           | 1           | 0            | 0           | 0           | 0           | <b>5</b>     |
| University of Washington                     | 0           | 0           | 0            | 0           | 0           | 3           | <b>3</b>     |
| Boston University                            | 0           | 0           | 2            | 0           | 0           | 0           | <b>2</b>     |
| New England Biolabs                          | 0           | 0           | 2            | 0           | 0           | 0           | <b>2</b>     |
| MSHS Pathogen Surveillance Program           | 1           | 0           | 0            | 0           | 0           | 0           | <b>1</b>     |
| <b>All</b>                                   | <b>7149</b> | <b>3321</b> | <b>16797</b> | <b>1785</b> | <b>3293</b> | <b>1046</b> | <b>33391</b> |

*Note: 7 RI and 10 CT sequences were missing metadata on GISAID as of 10/4/2021*
